# Supplementary material for: Evidence for the effectiveness of interventions to reduce mental health related stigma in the workplace: a systematic review
Source: PubMed Central journal article supplement (PMC9944311; doi:10.1136/bmjopen-2022-067126), 2023-02-20
Supplement: bmjopen-2022-067126supp001.pdf [file bmjopen-2022-067126supp001.pdf]

**Appendix 1:**

The following TI/AB keywords were used:

depress\* OR suic\* OR anx\* OR self-harm OR "mental health" OR discrimination OR exclusion  
AND  
occupation\* or workplace or SME OR job OR "small-sized enterprise\*" OR "medium-sized enterprise\*" OR "small enterprise\*" OR "medium enterprise\*" OR "small-sized compan\*" OR "medium-sized compan\*" OR "small compan\*" OR "medium compan\*" OR "small-sized business\*" OR "medium-sized business\*" OR "small business\*" OR "medium business\*" OR "small-sized organization\*" OR "small-sized organisation\*" OR "medium-sized organization\*" OR "medium-sized organisation\*" OR "small organization\*" OR "small organisation\*" OR "medium organization\*" OR "medium organisation\*")  
AND  
anti-stigma OR stigma  
AND  
reduced OR promot\* OR program\* OR campaign OR improve\* OR intervention OR educat\* OR seminar\* OR workshop\* OR course
