# Supplementary material for: Evidence for the effectiveness of interventions to reduce mental health related stigma in the workplace: a systematic review
Source: PubMed Central journal article supplement (PMC9944311; doi:10.1136/bmjopen-2022-067126), 2023-02-20
Supplement: bmjopen-2022-067126supp002.pdf [file bmjopen-2022-067126supp002.pdf]

Supplementary table 1. Overview of study characteristics

| First author/ year             | Study Design                         | Population at baseline and follow up | Gender at baseline     | Target group                                                          | Sector/ Size of organization  | Intervention                                                                                                                                                                                                                                                                                               | Intervention Intensity                                                                         | Country   |
|--------------------------------|--------------------------------------|--------------------------------------|------------------------|-----------------------------------------------------------------------|-------------------------------|------------------------------------------------------------------------------------------------------------------------------------------------------------------------------------------------------------------------------------------------------------------------------------------------------------|------------------------------------------------------------------------------------------------|-----------|
| <b>Bond et al, 2021</b>        | longitudinal cohort study            | 284 pre<br>98 post                   | 212 female<br>72 male  | support services, police, educators and general community networks    | public sector                 | Mental Health First Aid for the Suicidal Person course                                                                                                                                                                                                                                                     | 4-hours course                                                                                 | Australia |
| <b>Dimoff 2016</b>             | controlled study active vs wait list | 183 pre<br>142 post                  | 77 female<br>65 male   | Leaders in telecommunication companies                                | large company, private sector | Mental health awareness training                                                                                                                                                                                                                                                                           | 3 hours training                                                                               | Canada    |
| <b>Dobson et al, 2021</b>      | cluster-randomized trial             | 123 pre<br>101 post                  | 115 female<br>8 male   | office workers<br><br>kitchen and maintenance staff                   | large company, public sector  | The Working Mind program:<br><ul style="list-style-type: none"> <li>• trained facilitators,</li> <li>• workshop manuals,</li> <li>• contact-based videos</li> <li>• discussion exercises,</li> <li>• personal goal setting.</li> </ul> Participants allocated to immediate or delayed intervention groups. | 4-hours group program                                                                          | Canada    |
| <b>Dobson et al., 2019</b>     | open trial methodology               | 1292 pre<br>1155 post                | male 419<br>female 719 | government, education, health, energy supervisors and frontline staff | public sector                 | The Working Mind Program<br><ul style="list-style-type: none"> <li>• trained facilitators,</li> <li>• workshop manuals,</li> <li>• contact-based videos</li> <li>• discussion exercises,</li> <li>• personal goal setting.</li> </ul> “train-the- trainer” model                                           | Two versions:<br>4-hour group program for frontline workers<br><br>8-hour program for managers | Canada    |
| <b>Eiroa-Orosa et al, 2021</b> | cluster randomized-                  | 371 pre<br>260 post                  | 314 female<br>57 male  | primary health and mental health care professionals                   | public sector                 | awareness-raising intervention<br><br>The Targeted, Local, Credible, Continuous Contact (TLC3)                                                                                                                                                                                                             | <b>4 workshops</b><br>1. Training: pedagogy and contact (face-to face +video) – 4 hours        | Spain     |

|                              |                             |                     |                                              |                                                                                                                          |                                                     |                                                                                                                                                                               |                                                                                                        |           |
|------------------------------|-----------------------------|---------------------|----------------------------------------------|--------------------------------------------------------------------------------------------------------------------------|-----------------------------------------------------|-------------------------------------------------------------------------------------------------------------------------------------------------------------------------------|--------------------------------------------------------------------------------------------------------|-----------|
|                              | controlled trial            |                     |                                              | administrative officers, general practitioners, odontologists, nurses, psychiatrists, psychologists, and social workers. |                                                     | methodology adapted to the Catalan healthcare context                                                                                                                         | 2. self-diagnosis and prioritization – 4 hours<br>3. self-organized activities<br>4. follow-up session |           |
| <b>Griffith et al 2016</b>   | Randomised controlled trial | 507 pre<br>386 post | MH-guru:<br>male:<br>29%,<br>female:<br>70%; | multi-departmental government workplace                                                                                  | public sector                                       | online depression and anxiety educational workplace induction program (“Mental Health Guru”): two modules: depression and General anxiety disorder                            | 1 hour long online depression and anxiety educational program (1 module/week, 30min/module)            | Australia |
| <b>Haman et al., 2016</b>    | Longitudinal cohort study   | 580 pre             | 210 women<br>370 men                         | Leaders, members of the workers' council, workers in HR department                                                       | not specified companies (n=30)                      | “Mental-health-at-the-workplace” educational workshop                                                                                                                         | 1-1,5 days training                                                                                    | Germany   |
| <b>Hanisch et al., 2017</b>  | Longitudinal cohort study   | 48 pre              | 92% male,<br>8% female                       | Leaders                                                                                                                  | private sector – large enterprise                   | “Leadership Training in Mental Health Promotion” (LMHP), a digital game-based training program for leaders which is combining games and simulations in a virtual environment. | 1.5- 2 hours long single session                                                                       | UK        |
| <b>Kristman et al., 2019</b> | quasi-experimental          | 89 pre<br>61 post   | 59 male<br>24 female                         | Leaders in HR, occupational health and safety management                                                                 | public and private sector, different size companies | Multi-faceted:<br>1. “Standard to Action” training program designed to help employers implement the Standard in                                                               | 2 years                                                                                                | Canada    |

|                            |                                  |                                              |                                  |                            |                         |                                                                                                                                                                                                           |                                                                                                                                                                   |        |
|----------------------------|----------------------------------|----------------------------------------------|----------------------------------|----------------------------|-------------------------|-----------------------------------------------------------------------------------------------------------------------------------------------------------------------------------------------------------|-------------------------------------------------------------------------------------------------------------------------------------------------------------------|--------|
|                            |                                  |                                              |                                  |                            |                         | <p>their workplaces – 6 sessions;</p> <p>2. Education sessions: MH First Aid sessions;</p> <p>3. Social marketing campaign including a photovoice exhibit.</p>                                            |                                                                                                                                                                   |        |
| <b>Kubo et al, 2018</b>    | Single arm pilot trial           | 91 pre<br>83 post                            | male<br>77%<br>female<br>23%     | office workers             | no specific information | “Mental Health First Aid” (MHFA) training program modified for workplace settings.                                                                                                                        | 2-hour training course                                                                                                                                            | Japan  |
| <b>Moffitt et al, 2014</b> | random allocation design         | 106 pre<br>89 post                           | N/A                              | fire service line managers | public sector           | <p>Participants randomly assigned to:</p> <ul style="list-style-type: none"> <li>Looking after Wellbeing at Work” (LWW)</li> <li>Mental Health First Aid (MHFA)</li> <li>leaflet session (LS).</li> </ul> | <p>LWW- 2days</p> <p>MHFA – 12 hours</p> <p>LS- 1 hour</p>                                                                                                        | UK     |
| <b>Moll et al, 2018</b>    | randomised, parallel-group trial | 192 pre<br>167 post<br>150 by 6 mo follow up | female<br>88.5%<br>male<br>11.5% | Healthcare workers         | public sector           | <p>“Beyond Silence” (Beyond Silence program includes a contact-based educational approach )</p> <p>Mental Health First Aid training</p>                                                                   | comprising 6 in-person, 2-h sessions + 5 online sessions co-led by employees who personally experienced mental health issues standardised 2-days training program | Canada |

|                              |                             |                     |                        |                                                   |                                              |                                                                                                                                                                                                                                                                                                  |                                                                                                                                               |           |
|------------------------------|-----------------------------|---------------------|------------------------|---------------------------------------------------|----------------------------------------------|--------------------------------------------------------------------------------------------------------------------------------------------------------------------------------------------------------------------------------------------------------------------------------------------------|-----------------------------------------------------------------------------------------------------------------------------------------------|-----------|
| <b>Paterston et al, 2021</b> |                             | 134 pre<br>57 post  | not specified          | not specified                                     | public and private, different size companies | Headtorch WORKS - mental health and well-being intervention                                                                                                                                                                                                                                      | 3 online episodes + discussion group<br>6 hours<br>original filmed drama and specialist documentary                                           | UK        |
| <b>Quinn et al, 2011</b>     |                             | 101 pre<br>87 post  | 77% male<br>23% female | housing association and telecommunication workers | public and private sector                    | Training course on mental health awareness                                                                                                                                                                                                                                                       | One day training (6 hours each)<br><br>combination of service user narratives, experiential group learning, and didactic teaching approaches. | Scotland  |
| <b>Reavley et al., 2018</b>  | Randomized controlled trial | 608 pre<br>289 post | 449 female<br>159 male | public servants                                   | public sector                                | Participants randomized to<br><br>-eLearning MHFA,<br><br>-blended MHFA<br><br>-PFA eLearning                                                                                                                                                                                                    | - 6-hour eLearning MHFA online course<br>- 6-hour eLearning MHFA plus 4-hour face-to-face session<br>- 4-hour eLearning PFA online course     | Australia |
| <b>Shann et al., 2018</b>    | Randomized controlled trial | 311 pre<br>196 post | 148 male<br>163 female | Leaders                                           | public private non- profit other sectors 1%  | “Beyondblue” online materials for leaders:<br>Main focus on depression:<br>-written information,<br>-video clips of organizational leaders speaking about mental health in the workplace,<br>-interactive exercises in which participants can calculate the cost of untreated depression and the | 30 – 45 min                                                                                                                                   | Australia |

|                                   |                                   |                                                                                           |                                                                                                  |                                                                                                                                                         |                                  |                                                                                                                                                                                                                                                                           |                                                                                                                                                                        |           |
|-----------------------------------|-----------------------------------|-------------------------------------------------------------------------------------------|--------------------------------------------------------------------------------------------------|---------------------------------------------------------------------------------------------------------------------------------------------------------|----------------------------------|---------------------------------------------------------------------------------------------------------------------------------------------------------------------------------------------------------------------------------------------------------------------------|------------------------------------------------------------------------------------------------------------------------------------------------------------------------|-----------|
|                                   |                                   |                                                                                           |                                                                                                  |                                                                                                                                                         |                                  | specific risk factors in their organization.                                                                                                                                                                                                                              |                                                                                                                                                                        |           |
| <b>Svensson and Hansson, 2014</b> | Randomized controlled trial       | 416 pre<br>277 post                                                                       | 151 female<br>48 male                                                                            | Not specified employees                                                                                                                                 | public sector                    | Mental Health First Aid training                                                                                                                                                                                                                                          | 12 hours course, spread over two days                                                                                                                                  | Sweden    |
| <b>Szeto et al. 2019</b>          | non-randomized quasi-experimental | 5598 pre<br>4649 post<br>Frontline staff 75.8% (3,449)<br>Supervisory staff 26.4% (1,210) | male 55.9%<br>female 44.1%                                                                       | Corrections 9.0% (418)<br>Emergency Services (9-1-1) 3.9% (192)<br>Fire Services 17.7% (821)<br>Police Services 56.5% (2,623)<br>Paramedics 13.0% (605) | public sector                    | “Road to Mental Readiness for First Responders” program (R2MR)<br><b>3 main components:</b><br>stigma reduction through video contact-based education, the Mental Health Continuum Model, and “Big 4” coping and resilience skills.<br>Additional skills for supervisors. | 4-hour program for employees<br><br>8-hour program for supervisors                                                                                                     | Canada    |
| <b>Tynan et al. 2018</b>          | Non-Randomized controlled trial   | 1275 pre<br>1163 post<br>Supervisor: 117 pre<br>114 post                                  | 1014 male;<br>135 female;<br>Supervisor or training: 92 male;<br>10 female;<br>12 not specified. | Manager<br>Professional Trades worker<br>Machinery operator Admin or other                                                                              | private sector, medium and large | “Working Well Mental health Program”:<br><br>peer-based, multi-component mental health and suicide prevention program<br><br>supervisor training                                                                                                                          | - 1 hour ‘general awareness training’ (GAT),<br>- 4 hours of ‘gate-keeper training’,<br>-2-day ‘Applied Suicide Intervention Skills Training’ (ASIST) for key workers. | Australia |
