# Supplementary material for: Evidence for the effectiveness of interventions to reduce mental health related stigma in the workplace: a systematic review
Source: PubMed Central journal article supplement (PMC9944311; doi:10.1136/bmjopen-2022-067126), 2023-02-20
Supplement: bmjopen-2022-067126supp004.pdf [file bmjopen-2022-067126supp004.pdf]

Supplementary table 3: Quality assessment of the selected studies<sup>1</sup>

| <b>Quality of the selected studies</b> |                          |                            |
|----------------------------------------|--------------------------|----------------------------|
| <b>WEAK</b>                            | <b>MODERATE</b>          | <b>STRONG</b>              |
| Bond et al, 2021                       | Dimoff et al, 2016       | Moll et al, 2018           |
| Kristman et al, 2019                   | Dobson et al, 2019       |                            |
|                                        |                          | Svensson and Hansson, 2014 |
| Kubo et al, 2018                       | Dobson et al, 2021       |                            |
| Paterson et al, 2021                   | Eirosa-Orosa et al, 2021 |                            |
| Quinn et al, 2011                      | Griffith et al, 2016     |                            |
|                                        | Hamann et al, 2016       |                            |
|                                        | Hanisch et al, 2017      |                            |
|                                        | Moffitt et al, 2014      |                            |
|                                        | Reavley et al, 2018      |                            |
|                                        | Shann et al, 2018        |                            |
|                                        | Szetó et al, 2019        |                            |
|                                        | Tynan et al, 2018        |                            |

1: Based on Quality Assessment Tool for Quantitative Studies (QATQS) scale (Ciliska et al, 1998)
