# Supplementary material for: Evidence for the effectiveness of interventions to reduce mental health related stigma in the workplace: a systematic review
Source: PubMed Central journal article supplement (PMC9944311; doi:10.1136/bmjopen-2022-067126), 2023-02-20
Supplement: bmjopen-2022-067126supp005.pdf [file bmjopen-2022-067126supp005.pdf]

Supplementary Table 4: Quality Assessment of the included studies, based on the QATQS

| <b>First Author</b>               | <b>Selection Bias</b> | <b>Design</b> | <b>Confounders</b> | <b>Blinding</b> | <b>Data Collection Method</b> | <b>Withdrawals and Drop-out</b> | <b>Global Rating</b> |
|-----------------------------------|-----------------------|---------------|--------------------|-----------------|-------------------------------|---------------------------------|----------------------|
| <b>Bond et al, 2021</b>           | Strong                | Moderate      | Weak               | Moderate        | Strong                        | Weak                            | <b>Weak</b>          |
| <b>Dimoff et al, 2016</b>         | Weak                  | Strong        | Strong             | Strong          | Strong                        | Moderate                        | <b>Moderate</b>      |
| <b>Dobson et al, 2019</b>         | Moderate              | Moderate      | Weak               | Moderate        | Strong                        | Strong                          | <b>Moderate</b>      |
| <b>Dobson et al, 2021</b>         | Moderate              | Moderate      | Weak               | Strong          | Strong                        | Strong                          | <b>Moderate</b>      |
| <b>Eiroa-Orosa et al, 2021</b>    | Moderate              | Strong        | Weak               | Strong          | Strong                        | Moderate                        | <b>Moderate</b>      |
| <b>Griffith et al, 2016</b>       | Weak                  | Strong        | Strong             | Strong          | Strong                        | Moderate                        | <b>Moderate</b>      |
| <b>Hamann et al, 2016</b>         | Moderate              | Moderate      | Weak               | Moderate        | Strong                        | Strong                          | <b>Moderate</b>      |
| <b>Hanisch et al, 2017</b>        | Strong                | Moderate      | Weak               | Moderate        | Strong                        | Strong                          | <b>Moderate</b>      |
| <b>Kristman et al, 2019</b>       | Weak                  | Moderate      | Weak               | Moderate        | Weak                          | Moderate                        | <b>Weak</b>          |
| <b>Kubo et al, 2018</b>           | Strong                | Moderate      | Weak               | Weak            | Strong                        | Strong                          | <b>Weak</b>          |
| <b>Moffitt et al, 2014</b>        | Moderate              | Strong        | Strong             | Strong          | Weak                          | Strong                          | <b>Moderate</b>      |
| <b>Moll et al, 2018</b>           | Moderate              | Strong        | Strong             | Strong          | Strong                        | Moderate                        | <b>Strong</b>        |
| <b>Paterson et al, 2021</b>       | Weak                  | Moderate      | Weak               | Strong          | Strong                        | Weak                            | <b>Weak</b>          |
| <b>Quinn et al, 2011</b>          | Moderate              | Moderate      | Weak               | Weak            | Moderate                      | Strong                          | <b>Weak</b>          |
| <b>Reavley et al, 2018</b>        | Strong                | Strong        | Strong             | Strong          | Strong                        | Weak                            | <b>Moderate</b>      |
| <b>Shann et al, 2018</b>          | Weak                  | Strong        | Strong             | Strong          | Moderate                      | Moderate                        | <b>Moderate</b>      |
| <b>Svensson and Hansson, 2014</b> | Moderate              | Strong        | Strong             | Strong          | Strong                        | Moderate                        | <b>Strong</b>        |
| <b>Szető et al, 2019</b>          | Strong                | Moderate      | Weak               | Moderate        | Strong                        | Strong                          | <b>Moderate</b>      |

|                              |        |          |        |        |      |          |                 |
|------------------------------|--------|----------|--------|--------|------|----------|-----------------|
| <b>Tynan et al,<br/>2018</b> | Strong | Moderate | Strong | Strong | Weak | Moderate | <b>Moderate</b> |
|------------------------------|--------|----------|--------|--------|------|----------|-----------------|
